# Supplementary material
Source: publisher figshare collection journal article supplement (https://frontiersin.figshare.com/ndownloader/files/25307597)
Supplement: Supplementary file 1 [file 25307597]

**Supplemental Table 1: Amino Acid Composition (%) of Experimental Diet Formulations**

| Amino Acid (%) | Experimental Feed E | Experimental Feed F |
| --- | --- | --- |
| **Arginine*** | 1.69 | 1.60 |
| **Cystine** | 0.08 | 0.19 |
| **Histidine*** | 0.37 | 0.48 |
| **Isoleucine*** | 0.59 | 0.63 |
| **Leucine*** | 1.33 | 1.22 |
| **Lysine*** | 0.38 | 0.87 |
| **Methionine*** | 0.41 | 0.65 |
| **Phenylalanine*** | 0.69 | 0.81 |
| **Serine** | 0.24 | 1.01 |
| **Threonine*** | 0.66 | 0.95 |
| **Tryptophan*** | 0.06 | 0.25 |
| **Tyrosine** | 0.10 | 0.38 |
| **Valine*** | 0.95 | 0.83 |
| ***:** Essential amino acids in fish. *Amino acid composition of commercial feed (Classic Brood 46/12 Complete Feed) was not analyzed and considered proprietary* *by Skretting.* | | |
